# Supplementary material
Source: PubMed Central journal article supplement (PMC3392462)
Supplement: NIHMS374718-supplement-01.pdf [file NIHMS374718-supplement-01.pdf]

## ONLINE METHODS

### Crystallization

*E. coli* LeuRS with an N-terminal six-histidine tag and *E. coli* tRNA<sup>Leu</sup><sub>UAA</sub> transcript were prepared and purified as previously described<sup>1,2</sup>. Protein was stored in buffer comprising 20 mM Tris-HCl (pH 7.4), 100 mM NaCl, 5 mM MgCl<sub>2</sub> and 5 mM 2-β mercaptoethanol. Crystallization was performed at 20°C by the hanging drop vapor diffusion method. For the editing complex, solutions were prepared with 33 μM LeuRS, 40 μM tRNA<sup>Leu</sup> and 5 mM L-leucine or 1 mM 1-hydroxy-3H-2,1-benzoxaborole (a gift from Anacor Pharmaceuticals, Palo Alto, CA). Crystals were obtained by mixing 2 μL of this solution with 1 μL of reservoir solution containing 0.1 M sodium acetate (pH 5.6), 14-18% (w/v) PEG 6000 and 200 mM NaCl. The crystals were frozen in liquid nitrogen after transfer for a few seconds in the mother liquor containing 22% (v/v) ethylene glycol as cryoprotectant and the corresponding small substrates. In the case of the aminoacylation complex, solutions were prepared with 33 μM LeuRS, 50 μM tRNA<sup>Leu</sup> and 1 mM leucyl-adenylate analogue (LeuAMS, purchased from RNA-TEC, Leuven, Belgium). Crystals were obtained by mixing 2 μL of this solution with 2 μL of reservoir solution containing 0.1 M bis-TRIS (pH 5.5), 23-25% (w/v) PEG 3350, and 200 mM ammonium acetate. The crystals were frozen in liquid nitrogen prior to X-ray exposure without added cryoprotectant.

### Structure determination and refinement

All diffraction data sets were collected at the European Synchrotron Radiation Facility (ESRF, Grenoble, France) using a wavelength of 1.072 Å for the complex with L-leucine, 0.931 and 0.934 Å respectively for the orthorhombic- and monoclinic-crystal forms of the complex with benzoxaborole, and 0.938 Å for the complex with LeuAMS. Data were integrated and scaled with the XDS suite<sup>3</sup>. Further data analysis was performed with the CCP4 suite<sup>4</sup>. The structure of the LeuRS:tRNA<sup>Leu</sup>:L-leucine editing complex was initially solved by molecular replacement with PHASER<sup>5</sup> using the *T. thermophilus* LeuRS structure<sup>6</sup> (PDB 1H3N) without its editing domain and the *E. coli* LeuRS editing domain structure<sup>7</sup> (PDB 2AJG) as models. The model was improved by automatic building using ARP-wARP<sup>8</sup> and manual adjustments were made with COOT<sup>9</sup>. The structure of the aminoacylation complex was solved by molecular replacement with PHASER using the core of the protein

from the *E. coli* editing complex (1-223, 416-568 and 795-860 residues). The resulting map was used to manually position the core of the tRNA and the additional flexibly linked domains using COOT. Residues 159-189 of the Zn domain, not visible in the LeuRSEC editing complex, were built using the LeuRSTT Zn domain as a guide. All models were refined using REFMAC5 with TLS. The orthorhombic ( $P2_12_12_1$ ) and monoclinic ( $P2_1$ ) forms of the LeuRSEC editing complex have only minor differences involving a small coordinated rotation of the C-terminal domain tRNA and editing domain, without changing specific protein-tRNA interactions. In the monoclinic form the C-terminal domain is partially disordered and in general the B-factors are slightly higher. Interfaces were analyzed with the PISA server ([http://www.ebi.ac.uk/msd-srv/prot\\_int/pistart.html](http://www.ebi.ac.uk/msd-srv/prot_int/pistart.html)) and domain motions with the program DynDom<sup>10</sup>. Structure quality was analyzed with MOLPROBITY<sup>11</sup> (<http://molprobit.biochem.duke.edu/>) and showed all residues in allowed regions (with 95.1-98.0% of residues in favored regions) for the different models. Figures were drawn with PYMOL (<http://www.pymol.org/>), and a video showing the conformational changes between the aminoacylation and editing states was generated by CHIMERA (<http://www.cgl.ucsf.edu/chimera>).

### Enzyme assays

A reaction mixture consisting of 60 mM Tris, pH 7.5, 10 mM MgCl<sub>2</sub>, 1 mM DTT, 4 mM ATP, 21 μM [<sup>3</sup>H]-leucine (10 μCi nmol<sup>-1</sup>) and 2.5 μM tRNA<sup>Leu</sup> was initiated by the addition of 25 nM enzyme and quenched<sup>12</sup>. Higher concentrations of 4 μM tRNA<sup>Leu</sup> and 1 μM enzyme concentrations were used for weak mutant activities (Supplementary Fig. 6c,d). Leucine-dependent PPi-ATP exchange reactions contained 50 mM HEPES pH 8.0, 10 mM MgCl<sub>2</sub>, 1 mM DTT, 1 mM ATP, 1 mM [<sup>32</sup>P]-PP<sub>i</sub> (10 μCi μmol<sup>-1</sup>), 1 mM leucine and were initiated by 10 nM enzyme. Each reaction was quenched on Baker-Flex poly-ethyleneimine cellulose TLC plates and chromatographed in 750 mM KH<sub>2</sub>PO<sub>4</sub> pH 3.5, 4 M urea at 25 °C.

## References

1. Larkin, D.C., Williams, A.M., Martinis, S.A. & Fox, G.E. Identification of essential domains for Escherichia coli tRNA(Leu) aminoacylation and amino acid editing using minimalist RNA molecules. *Nucleic Acids Res* **30**, 2103-13 (2002).
2. Vu, M.T. & Martinis, S.A. A unique insert of leucyl-tRNA synthetase is required for aminoacylation and not amino acid editing. *Biochemistry* **46**, 5170-6 (2007).
3. Kabsch, W. Automatic processing of rotation diffraction data from crystals of initially unknown symmetry and cell constants. *J. Appl. Cryst.* **26**, 795-800 (1993).
4. C.C.P.N. The CCP4 suite: programs for protein crystallography. *Acta Crystallogr D* **D50**, 760-763 (1994).
5. McCoy, A.J., Grosse-Kunstleve, R.W., Storoni, L.C. & Read, R.J. Likelihood-enhanced fast translation functions. *Acta Crystallogr D Biol Crystallogr* **61**, 458-64 (2005).
6. Cusack, S., Yaremchuk, A. & Tukalo, M. The 2 Å crystal structure of leucyl-tRNA synthetase and its complex with a leucyl-adenylate analogue. *Embo J* **19**, 2351-61 (2000).
7. Liu, Y., Liao, J., Zhu, B., Wang, E.D. & Ding, J. Crystal structures of the editing domain of Escherichia coli leucyl-tRNA synthetase and its complexes with Met and Ile reveal a lock-and-key mechanism for amino acid discrimination. *Biochem J* **394**, 399-407 (2006).
8. Perrakis, A., Morris, R. & Lamzin, V.S. Automated protein model building combined with iterative structure refinement. *Nat Struct Biol* **6**, 458-63 (1999).
9. Emsley, P. & Cowtan, K. Coot: model-building tools for molecular graphics. *Acta Crystallogr D Biol Crystallogr* **60**, 2126-32 (2004).
10. Hayward, S. & Lee, R.A. Improvements in the analysis of domain motions in proteins from conformational change: DynDom version 1.50. *J Mol Graph Model* **21**, 181-3 (2002).
11. Chen, V.B. et al. MolProbity: all-atom structure validation for macromolecular crystallography. *Acta Crystallogr D Biol Crystallogr* **66**, 12-21 (2010).
12. Lincecum, T.L., Jr. et al. Structural and mechanistic basis of pre- and posttransfer editing by leucyl-tRNA synthetase. *Mol Cell* **11**, 951-63 (2003).
